# Supplementary material
Source: HighWire-hosted journal article supplement (https://svn.smart01.highwire.org/content/svn-2020-000803)
Supplement: inline-supplementary-material-1 [file inline-supplementary-material-1.pdf]

## SUPPLEMENTAL MATERIAL

**Supplemental table 1. Baseline characteristics and outcomes of late window patients with EVT  $\geq 6.5$  hours after known time of stroke onset versus late window patients with EVT  $\geq 6.5$  hours after unknown time of stroke onset.**

|                                                          | Late window patients with<br>EVT $\geq 6.5$ hours after known<br>time of stroke onset (n=13) | Late window patients with EVT<br>$\geq 6.5$ hours after unknown time<br>of stroke onset (LSW) (n=93) | p value*        |
|----------------------------------------------------------|----------------------------------------------------------------------------------------------|------------------------------------------------------------------------------------------------------|-----------------|
| <b>Baseline characteristics</b>                          |                                                                                              |                                                                                                      |                 |
| Age (years); mean (SD)                                   | 67.7 (17.4)                                                                                  | 67.0 (14.3)                                                                                          | 0.87            |
| Sex (male)                                               | 3/13 (23.1%)                                                                                 | 44/93 (47.3%)                                                                                        | 0.10            |
| Pre-stroke mRS 0-1                                       | 11/13 (84.6%)                                                                                | 75/93 (80.6%)                                                                                        | 0.73            |
| Pre-stroke mRS 0-2                                       | 0                                                                                            | 83/93 (89.2%)                                                                                        | 0.21            |
| NIHSS at presentation; median [IQR]                      | 15 [9-19] (n=12)                                                                             | 16 [11-20] (n=91)                                                                                    | 0.47            |
| ASPECTS at presentation; median [IQR]                    | 9 [7-10] (n=13)                                                                              | 8 [6-10] (n=89)                                                                                      | 0.24            |
| Location of occlusion                                    |                                                                                              |                                                                                                      | 0.68            |
| ICA                                                      | 2/13 (15.4%)                                                                                 | 27/89 (30.3%)                                                                                        |                 |
| MCA M1-segment                                           | 9/13 (69.2%)                                                                                 | 48/89 (53.9%)                                                                                        |                 |
| MCA M2-segment                                           | 2/13 (15.4%)                                                                                 | 13/89 (14.6%)                                                                                        |                 |
| Other (M3, ACA)                                          | 0                                                                                            | 1/89 (1.1%)                                                                                          |                 |
| Collateral status                                        |                                                                                              |                                                                                                      | 0.61            |
| Absent collaterals                                       | 0                                                                                            | 2/88 (2.3%)                                                                                          |                 |
| Filling $\leq 50\%$ of occluded area                     | 3/13 (23.1%)                                                                                 | 27/88 (30.7%)                                                                                        |                 |
| Filling 51-100% of occluded area                         | 7/13 (53.8%)                                                                                 | 31/88 (35.2%)                                                                                        |                 |
| Filling 100% of occluded area                            | 3/13 (23.1%)                                                                                 | 28/88 (31.8%)                                                                                        |                 |
| CT perfusion performed                                   | 2/13 (15.4%)                                                                                 | 19/93 (20.4%)                                                                                        | 0.67            |
| Transfer from primary hospital to<br>intervention center | 9/13 (69.2%)                                                                                 | 25/93 (26.9%)                                                                                        | <b>&lt;0.01</b> |
| Treated with IVT                                         | 6/13 (46.2%)                                                                                 | 18/92 (19.6%)                                                                                        | <b>0.03</b>     |

|                                                                                  |                                   |                                   |                 |
|----------------------------------------------------------------------------------|-----------------------------------|-----------------------------------|-----------------|
| Time between onset/LSW and groin puncture in minutes; mean (SD); median [IQR]    | 516 (172) (n=13)<br>449 [405-553] | 565 (175) (n=93)<br>518 [420-654] | 0.34            |
| Time between onset/LSW and sheath from groin in minutes; mean (SD); median [IQR] | 501 (63) (n=9)<br>481 [455-548]   | 628 (189) (n=86)<br>578 [469-733] | <b>0.05</b>     |
| Performed procedure                                                              |                                   |                                   | 0.91            |
| Attempt for thrombectomy                                                         | 12/13 (92.3%)                     | 85/93 (91.4%)                     |                 |
| Catheterization/DSA only                                                         | 1/13 (7.7%)                       | 8/93 (8.6%)                       |                 |
| <b>Outcomes</b>                                                                  |                                   |                                   | <i>p</i> value† |
| Primary outcome                                                                  |                                   |                                   |                 |
| Median 3-month mRS score [IQR]                                                   | 2 [1-5] (n=13)                    | 3 [2-5] (n=91)                    | 0.52            |
| Secondary outcomes                                                               |                                   |                                   |                 |
| Functional independence (3-month mRS 0-2)                                        | 61.5% (8/13)                      | 40.7% (37/91)                     | 0.16            |
| Successful reperfusion (eTICI ≥2B)                                               | 46.2% (6/13)                      | 58.4% (52/89)                     | 0.40            |
| Significant early clinical improvement (≥4 points decrease on NIHSS or NIHSS 0)  | 45.5% (5/11)                      | 46.6% (41/88)                     | 0.94            |
| Safety outcomes                                                                  |                                   |                                   |                 |
| Peri-interventional complications                                                | 7.7% (1/13)                       | 9.7% (9/93)                       | 0.82            |
| Symptomatic intracranial hemorrhage                                              | 7.7% (1/13)                       | 4.3% (4/93)                       | 0.59            |
| Mortality at 3 months                                                            | 23.1% (3/13)                      | 24.2% (22/91)                     | 0.93            |

\*Chi-square tests for categorical variables and independent t-tests or Mann-Whitney U tests for continuous variables with complete data

†Mann-Whitney U test for difference in 3-month mRS score and chi-square tests for difference in proportions of other outcomes

EVT: endovascular treatment; SD: standard deviation; mRS: modified Rankin Scale; NIHSS: National Institutes of Health Stroke Scale; IQR: interquartile range; ASPECTS: Alberta Stroke Programme Early CT Score; ICA: internal carotid artery; MCA: middle cerebral artery; ACA: anterior cerebral artery; IVT: intravenous thrombolysis; LSW: last seen well; DSA: digital subtraction angiography; eTICI: extended Treatment In Cerebral Infarction

**Supplemental table 2. Baseline characteristics and outcomes of late window patients with EVT  $\geq$ 6.5hrs who received CT perfusion imaging vs. late window patients with EVT  $\geq$ 6.5hrs who did not receive CT perfusion imaging**

|                                                                                     | Late window patients with<br>EVT $\geq$ 6.5hrs with CT<br>perfusion imaging (n=21) | Late window patients with<br>EVT $\geq$ 6.5hrs without CT<br>perfusion imaging (n=85) | <i>p</i> value* |
|-------------------------------------------------------------------------------------|------------------------------------------------------------------------------------|---------------------------------------------------------------------------------------|-----------------|
| <b>Baseline characteristics</b>                                                     |                                                                                    |                                                                                       |                 |
| Age (years); mean (SD)                                                              | 65.8 (14.4)                                                                        | 67.4 (14.7)                                                                           | 0.65            |
| Sex (male)                                                                          | 10/21 (47.6%)                                                                      | 37/85 (43.5%)                                                                         | 0.74            |
| Pre-stroke mRS 0-1                                                                  | 18/21 (85.7%)                                                                      | 68/85 (80.0%)                                                                         | 0.55            |
| Pre-stroke mRS 0-2                                                                  | 20/21 (95.2%)                                                                      | 76/85 (89.4%)                                                                         | 0.41            |
| NIHSS at presentation; median [IQR]                                                 | 13 [8-17] (n=19)                                                                   | 16 [12-20] (n=84)                                                                     | <b>0.01</b>     |
| ASPECTS at presentation; median [IQR]                                               | 7 [5-9] (n=20)                                                                     | 9 [7-10] (n=82)                                                                       | 0.09            |
| Location of occlusion                                                               |                                                                                    |                                                                                       | 0.12            |
| ICA                                                                                 | 5/21 (23.8%)                                                                       | 24/81 (29.6%)                                                                         |                 |
| MCA M1-segment                                                                      | 10/21 (47.6%)                                                                      | 47/81 (58.0%)                                                                         |                 |
| MCA M2-segment                                                                      | 5/21 (23.8%)                                                                       | 10/81 (12.3%)                                                                         |                 |
| Other (M3, ACA)                                                                     | 1/21 (4.8%)                                                                        | 0                                                                                     |                 |
| Collateral status                                                                   |                                                                                    |                                                                                       | 0.80            |
| Absent collaterals                                                                  | 0                                                                                  | 2/82 (2.4%)                                                                           |                 |
| Filling $\leq$ 50% of occluded area                                                 | 6/19 (31.6%)                                                                       | 24/82 (29.3%)                                                                         |                 |
| Filling 51-100% of occluded area                                                    | 6/19 (31.6%)                                                                       | 32/82 (39.0%)                                                                         |                 |
| Filling 100% of occluded area                                                       | 7/19 (36.8%)                                                                       | 24/82 (29.3%)                                                                         |                 |
| Treated with IVT                                                                    | 4/21 (19.0%)                                                                       | 20/84 (23.8%)                                                                         | 0.64            |
| Unknown time of onset                                                               | 19/21 (90.5%)                                                                      | 74/85 (87.1%)                                                                         | 0.67            |
| Time between onset/LSW and groin puncture in<br>minutes; mean (SD); median [IQR]    | 540 (146) (n=21)<br>518 [420-609]                                                  | 563 (181) (n=85)<br>505 [415-664]                                                     | 0.58            |
| Time between onset/LSW and sheath from groin<br>in minutes; mean (SD); median [IQR] | 577 (159) (n=18)<br>523 [478-649]                                                  | 625 (190) (n=77)<br>571 [463-719]                                                     | 0.33            |
| Performed procedure                                                                 |                                                                                    |                                                                                       | 0.85            |
|                                                                                     | 19/21 (90.5%)                                                                      | 78/85 (91.8%)                                                                         |                 |

|                                                                                 |                |                |                 |
|---------------------------------------------------------------------------------|----------------|----------------|-----------------|
| Attempt for thrombectomy                                                        | 2/21 (9.5%)    | 7/85 (8.2%)    |                 |
| Catheterization/DSA only                                                        |                |                |                 |
| <b>Outcomes</b>                                                                 |                |                | <i>p</i> value† |
| <u>Primary outcome</u>                                                          |                |                |                 |
| Median 3-month mRS score [IQR]                                                  | 2 [2-4] (n=21) | 3 [2-6] (n=83) | 0.83            |
| <u>Secondary outcomes</u>                                                       |                |                |                 |
| Functional independence (3-month mRS 0-2)                                       | 42.9% (9/21)   | 43.4% (36/83)  | 0.97            |
| Successful reperfusion (eTICI ≥2B)                                              | 68.4% (13/19)  | 54.2% (45/83)  | 0.26            |
| Significant early clinical improvement (≥4 points decrease on NIHSS or NIHSS 0) | 27.8% (5/18)   | 50.6% (41/81)  | 0.08            |
| <u>Safety outcomes</u>                                                          |                |                |                 |
| Peri-interventional complications                                               | 9.5% (2/21)    | 9.4% (8/85)    | 0.99            |
| Symptomatic intracranial hemorrhage                                             | 14.3% (3/21)   | 2.4% (2/85)    | <b>0.02</b>     |
| Mortality at 3 months                                                           | 14.3% (3/21)   | 26.5% (22/83)  | 0.24            |

\*Chi-square tests for categorical variables and independent t-tests or Mann-Whitney U tests for continuous variables with complete data.

†Mann-Whitney U test for difference in 3-month mRS score and chi-square tests for difference in proportions of other outcomes

EVT: endovascular treatment; SD: standard deviation; mRS: modified Rankin Scale; NIHSS: National Institutes of Health Stroke Scale; IQR: interquartile range; ASPECTS: Alberta Stroke Program Early CT Score; ICA: internal carotid artery; MCA: middle cerebral artery; ACA: anterior cerebral artery; IVT: intravenous thrombolysis; LSW: last seen well; DSA: digital subtraction angiography; eTICI: extended Treatment In Cerebral Ischemia

**Supplemental table 3. Baseline characteristics and outcomes of patients with known time of stroke onset treated with EVT beyond versus within 6.5 hours.**

|                                                                                  | Late window patients with<br>EVT $\geq$ 6.5 hours after known<br>time of stroke onset (n=13) | Early window patients with<br>EVT <6.5 hours after known<br>time of stroke onset (n=2316) | <i>p</i> value* |
|----------------------------------------------------------------------------------|----------------------------------------------------------------------------------------------|-------------------------------------------------------------------------------------------|-----------------|
| <b>Baseline characteristics</b>                                                  |                                                                                              |                                                                                           |                 |
| Age (years); mean (SD)                                                           | 67.7 (17.4)                                                                                  | 69.3 (14.1)                                                                               | 0.69            |
| Sex (male)                                                                       | 3/13 (23.1%)                                                                                 | 1246/2316 (53.8%)                                                                         | <b>0.03</b>     |
| Pre-stroke mRS 0-1                                                               | 11/13 (84.6%)                                                                                | 1879/2269 (82.8%)                                                                         | 0.86            |
| Pre-stroke mRS 0-2                                                               | 0                                                                                            | 2038/2269 (89.8%)                                                                         | 0.23            |
| NIHSS at presentation; median [IQR]                                              | 15 [9-19] (n=12)                                                                             | 15 [11-19] (n=2278)                                                                       | 0.72            |
| ASPECTS at presentation; median [IQR]                                            | 9 [7-10] (n=13)                                                                              | 9 [8-10] (n=2245)                                                                         | 0.90            |
| Location of occlusion                                                            |                                                                                              |                                                                                           | 0.80            |
| ICA                                                                              | 2/13 (15.4%)                                                                                 | 589/2203 (26.7%)                                                                          |                 |
| MCA M1-segment                                                                   | 9/13 (69.2%)                                                                                 | 1276/2203 (57.9%)                                                                         |                 |
| MCA M2-segment                                                                   | 2/13 (15.4%)                                                                                 | 322/2203 (14.6%)                                                                          |                 |
| Other (M3, ACA)                                                                  | 0                                                                                            | 16/2203 (0.7%)                                                                            |                 |
| Collateral status                                                                |                                                                                              |                                                                                           | 0.55            |
| Absent collaterals                                                               | 0                                                                                            | 127/2169 (5.9%)                                                                           |                 |
| Filling $\leq$ 50% of occluded area                                              | 3/13 (23.1%)                                                                                 | 768/2169 (35.4%)                                                                          |                 |
| Filling 51-100% of occluded area                                                 | 7/13 (53.8%)                                                                                 | 853/2169 (39.3%)                                                                          |                 |
| Filling 100% of occluded area                                                    | 3/13 (23.1%)                                                                                 | 421/2169 (19.4%)                                                                          |                 |
| CT perfusion performed                                                           | 2/13 (15.4%)                                                                                 | 218/1201 (18.2%)                                                                          | 0.80            |
| Transfer from another hospital to intervention<br>center                         | 9/13 (69.2%)                                                                                 | 1306/2316 (56.4%)                                                                         | 0.35            |
| Treated with IVT                                                                 | 6/13 (46.2%)                                                                                 | 1825/2309 (79.0%)                                                                         | <b>&lt;0.01</b> |
| Time between onset/LSW and groin puncture<br>in minutes; mean (SD); median [IQR] | 516 (172) (n=13)<br>449 [405-553]                                                            | 187 (64) (n=2316)<br>180 [140-225]                                                        | <b>&lt;0.01</b> |

|                                                                                        |                                 |                                    |                 |
|----------------------------------------------------------------------------------------|---------------------------------|------------------------------------|-----------------|
| Time between onset/LSW and sheath from groin in minutes; mean (SD); median [IQR]       | 501 (63) (n=9)<br>481 [455-548] | 243 (72) (n=2147)<br>235 [190-290] | <b>&lt;0.01</b> |
| Performed procedure                                                                    |                                 |                                    | 0.48            |
| Attempt for thrombectomy                                                               | 12/13 (92.3%)                   | 1972/2308 (85.4%)                  |                 |
| Catheterization/DSA only                                                               | 1/13 (7.7%)                     | 336/2308 (14.6%)                   |                 |
| <b>Outcomes</b>                                                                        |                                 |                                    | <b>p value†</b> |
| Primary outcome                                                                        |                                 |                                    |                 |
| Median 3-month mRS score [IQR]                                                         | 2 [1.5-5.5] (n=13)              | 3 [2-6] (n=2155)                   | 0.65            |
| Secondary outcomes                                                                     |                                 |                                    |                 |
| Functional independence (3-month mRS 0-2)                                              | 61.5% (8/13)                    | 43.3% (933/2155)                   | 0.19            |
| Successful reperfusion (eTICI $\geq$ 2B)                                               | 46.2% (6/13)                    | 61.2% (1377/2251)                  | 0.27            |
| Significant early clinical improvement ( $\geq$ 4 points decrease on NIHSS or NIHSS 0) | 45.5% (5/11)                    | 54.9% (1136/2068)                  | 0.53            |
| Safety outcomes                                                                        |                                 |                                    |                 |
| Peri-interventional complications                                                      | 7.7% (1/13)                     | 9.0% (208/2316)                    | 0.87            |
| Symptomatic intracranial hemorrhage                                                    | 7.7% (1/13)                     | 6.0% (139/2316)                    | 0.80            |
| Mortality at 3 months                                                                  | 23.1% (3/13)                    | 27.0% (581/2155)                   | 0.75            |

\*Chi-square tests for categorical variables and independent t-tests or Mann-Whitney U tests for continuous variables with complete data

†Mann-Whitney U test for difference in 3-month mRS score and chi-square tests for difference in proportions of other outcomes

EVT: endovascular treatment; SD: standard deviation; mRS: modified Rankin Scale; NIHSS: National Institutes of Health Stroke Scale; IQR: interquartile range; ASPECTS: Alberta Stroke Programme Early CT Score; ICA: internal carotid artery; MCA: middle cerebral artery; ACA: anterior cerebral artery; IVT: intravenous thrombolysis; LSW: last seen well; DSA: digital subtraction angiography; eTICI: extended Treatment In Cerebral Infarction



**Supplemental table 4. Logistic regression analysis for late vs. early window patients.**

|                                                                                        | <u>Late window patients with EVT <math>\geq</math>6.5 hours (n=106) versus early window patients with EVT &lt;6.5 hours (n=3158) after onset or LSW</u> |                |                          |                |
|----------------------------------------------------------------------------------------|---------------------------------------------------------------------------------------------------------------------------------------------------------|----------------|--------------------------|----------------|
|                                                                                        | unadjusted OR<br>(95% CI)                                                                                                                               | <i>p</i> value | adjusted OR<br>(95% CI)* | <i>p</i> value |
| <b>Primary outcome</b>                                                                 |                                                                                                                                                         |                |                          |                |
| 3-month mRS score reduction (shift analysis) †                                         | 1.02 (0.72-1.44)                                                                                                                                        | 0.92           | 0.86 (0.58-1.28)         | 0.46           |
| <b>Secondary outcomes</b>                                                              |                                                                                                                                                         |                |                          |                |
| Functional independence (3-month mRS 0-2)                                              | 1.12 (0.76-1.67)                                                                                                                                        | 0.57           | 0.89 (0.53-1.49)         | 0.65           |
| Successful reperfusion (eTICI $\geq$ 2B)                                               | 0.83 (0.56-1.24)                                                                                                                                        | 0.36           | 0.85 (0.54-1.32)         | 0.46           |
| Significant early clinical improvement ( $\geq$ 4 points decrease on NIHSS or NIHSS 0) | 0.72 (0.48-1.07)                                                                                                                                        | 0.11           | 0.72 (0.46-1.14)         | 0.17           |
| <b>Safety outcomes</b>                                                                 |                                                                                                                                                         |                |                          |                |
| Peri-interventional complications                                                      | 1.10 (0.57-2.13)                                                                                                                                        | 0.79           | 1.06 (0.49-2.27)         | 0.89           |
| Symptomatic intracranial hemorrhage                                                    | 0.80 (0.32-1.98)                                                                                                                                        | 0.62           | 0.84 (0.30-2.39)         | 0.75           |
| Mortality at 3 months                                                                  | 0.78 (0.49-1.23)                                                                                                                                        | 0.28           | 0.88 (0.50-1.57)         | 0.67           |

\*Adjusted for: age, pre-stroke mRS, NIHSS at presentation, ASPECTS at presentation, location of occlusion, collateral status and treatment with IVT

†Common odds ratio indicating the odds of improvement of 1 point on the mRS

EVT: endovascular treatment; LSW: last seen well; OR: odds ratio; CI: confidence interval; mRS: modified Rankin Scale; eTICI: extended Treatment In Cerebral Infarction; NIHSS: National Institutes of Health Stroke Scale

**Supplemental table 5. Baseline characteristics of matched early window vs. late window patients of the 5 imputed datasets.**

|                                       | Matched early window patients<br>with EVT <6.5 hours after onset<br>or LSW (n=1022)* | Matched late window patients<br>with EVT ≥6.5 hours after onset<br>or LSW (n=511)* |
|---------------------------------------|--------------------------------------------------------------------------------------|------------------------------------------------------------------------------------|
| Age (years); mean (SD)                | 67.4 (14.5)                                                                          | 67.7 (14.4)                                                                        |
| Sex (male)                            | 546 (53.4%)                                                                          | 224 (43.8%)                                                                        |
| Pre-stroke mRS 0-1                    | 836 (81.8%)                                                                          | 411 (80.4%)                                                                        |
| Pre-stroke mRS 0-2                    | 932 (91.2%)                                                                          | 461 (90.2%)                                                                        |
| NIHSS at presentation; median [IQR]   | 16 [11-20]                                                                           | 15 [11-20]                                                                         |
| ASPECTS at presentation; median [IQR] | 8 [7-10]                                                                             | 8 [6-9]                                                                            |
| Location of occlusion                 |                                                                                      |                                                                                    |
| ICA                                   | 282 (27.6%)                                                                          | 138 (27.0%)                                                                        |
| MCA M1-segment                        | 582 (56.9%)                                                                          | 291 (56.9%)                                                                        |
| MCA M2-segment                        | 143 (14.0%)                                                                          | 76 (14.9%)                                                                         |
| Other (M3, ACA)                       | 15 (1.5%)                                                                            | 6 (1.2%)                                                                           |
| Collateral status                     |                                                                                      |                                                                                    |
| Absent collaterals                    | 23 (2.3%)                                                                            | 11 (2.2%)                                                                          |
| Filling ≤50% of occluded area         | 284 (27.8%)                                                                          | 153 (29.9%)                                                                        |
| Filling 51-100% of occluded area      | 384 (37.6%)                                                                          | 193 (37.8%)                                                                        |
| Filling 100% of occluded area         | 331 (32.4%)                                                                          | 154 (30.1%)                                                                        |
| Treated with IVT                      | 266 (26.0%)                                                                          | 124 (24.3%)                                                                        |

|                                           |               |               |
|-------------------------------------------|---------------|---------------|
| Time between onset/LSW and groin puncture | 210 (81)      | 557 (175)     |
| in minutes; mean (SD); median [IQR]       | 195 [150-270] | 505 [415-634] |
| Time between onset/LSW and sheath from    | 267 (89)      | 592 (195)     |
| groin in minutes; mean (SD); median [IQR] | 255 [196-331] | 548 [459-672] |

\*With a caliper of 0.2, 511 (96.4%) of the 530 late window patients with EVT  $\geq$ 6.5 hours (5 datasets with 106 late window patients per dataset) could be matched in a 1:2 ratio to 1022 early window patients with EVT <6.5 hours after onset or LSW.

EVT: endovascular treatment; LSW: last seen well; SD: standard deviation; mRS: modified Rankin Scale;

NIHSS: National Institutes of Health Stroke Scale; IQR: interquartile range; ASPECTS: Alberta Stroke

Programme Early CT Score; IQR: interquartile range; ICA: internal carotid artery; MCA: middle cerebral artery;

ACA: anterior cerebral artery; IVT: intravenous thrombolysis
